# Supplementary material for: Dual-lifetime referencing (DLR): a powerful method for on-line measurement of internal pH in carrier-bound immobilized biocatalysts
Source: Springer Nature journal article supplement (doi:10.1186/1472-6750-12-11), 2012-03-28
Supplement: 12896_2011_699_MOESM1_ESM.pdf [file 12896_2011_699_MOESM1_ESM.pdf]

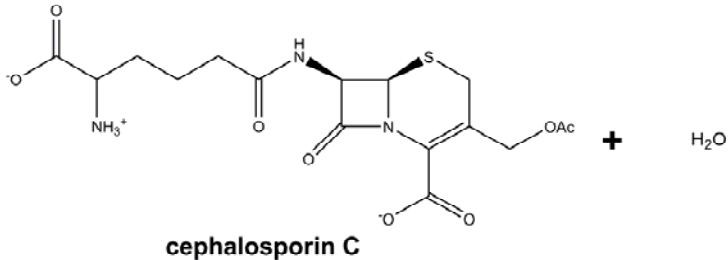

**D-Amino Adipic Acid (DAAA)**

**7-Amino Cephalosporanic Acid (7-ACA)**
